# Supplementary material
Source: ML conference proceedings conference paper supplement (https://proceedings.mlr.press/v108/goldfeld20a.html)
Supplement: Supplementary file 1 [file goldfeld20a-supp.pdf]

## Supplementary Material for Gaussian-Smoothed Optimal Transport: Metric Structure and Statistical Efficiency

### A Non-Uniform Results

Figure 2 shows results for a non-uniform  $\mu$ , specifically for  $\mu$  an isotropic  $d = 100$  Gaussian. Note that the behavior is qualitatively the same as the results for uniform  $\mu$  in the main text.

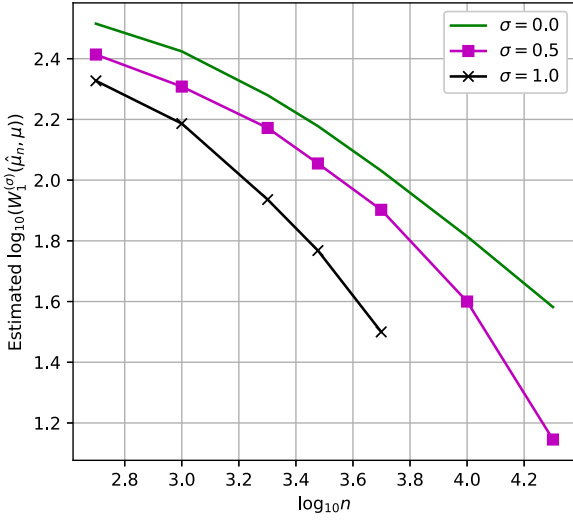

Figure 2: Non-uniform experiment. Convergence of  $W_1^{(\sigma)}(\hat{\mu}_n, \mu)$  as a function of  $n$  for various values of  $\sigma$ , shown in log-log space. The measure  $\mu$  is the  $d$ -dimensional standard normal distribution, where  $d = 100$ . The  $\sigma = 0$  case corresponds to the vanilla 1-Wasserstein distance, which converges slower than GOT (note the difference in slopes).

### B Proof of Lemma 2

Recall that  $g_\sigma(t) = \prod_{j=1}^d \tilde{g}_\sigma(t_j)$ , where  $\tilde{g}_\sigma$  is  $\sigma$ -subgaussian, zero mean, bounded, and monotonically decreasing as  $t_j$  moves away from zero. We first analyze the one-dimensional densities  $\tilde{g}_\sigma$ , and show that there exists a constant  $c > 0$ , such that

$$\tilde{g}_\sigma(t) \leq c e^{2\delta|t| - \delta^2 - \log \delta} \tilde{\varphi}_\sigma(t), \quad \forall t \in \mathbb{R}, \quad (28)$$

which by [31] yields

$$\mathbb{P}_{\tilde{g}_\sigma}((-\infty, t) \cup (t, \infty)) \leq \exp(1 - t^2/(2\sigma^2)) = c' \tilde{\varphi}_\sigma(t), \quad (30)$$

where  $\tilde{\varphi}_\sigma$  is a scalar Gaussian density (zero mean and  $\sigma^2$  variance). We prove (28) for  $t > 0$ ; the  $t < 0$  case is identical.

Note that the  $\sigma$ -subgaussianity of  $\tilde{g}_\sigma$  (Def. 3) implies that

$$\mathbb{E}_{\tilde{g}_\sigma} [e^{\alpha X}] \leq e^{\frac{1}{2}\sigma^2 \alpha^2}, \quad \forall \alpha \in \mathbb{R}, \quad (29)$$

where  $c' = \sqrt{2\pi\sigma^2}e^2$ . Consequently, for any  $t^*$ ,

$$\begin{aligned} \mathbb{P}_{\tilde{g}_\sigma}((t^* - \delta, t^*]) &\leq \mathbb{P}_{\tilde{g}_\sigma}((t^* - \delta, \infty)) \\ &\leq c' \tilde{\varphi}_\sigma(t^* - \delta) \\ &= c' e^{(t^*)^2 - (t^* - \delta)^2} \tilde{\varphi}_\sigma(t^*) \\ &= c' e^{2\delta t^* - \delta^2} \tilde{\varphi}_\sigma(t^*). \end{aligned} \quad (31)$$

Now, since  $\tilde{g}_\sigma(t)$  monotonically decreases as  $t$  moves away from zero, for any  $t^* \geq \delta$  we have  $\mathbb{P}_{\tilde{g}_\sigma}((t^* - \delta, t^*]) \geq \delta \tilde{g}_\sigma(t^*)$ . Substituting this into (31), we have for all  $t^* \geq \delta$  that

$$\begin{aligned} \delta \tilde{g}_\sigma(t^*) &\leq c' e^{2\delta t^* - \delta^2} \tilde{\varphi}_\sigma(t^*), \\ \tilde{g}_\sigma(t^*) &\leq c' e^{2\delta t^* - \delta^2 - \log \delta} \tilde{\varphi}_\sigma(t^*). \end{aligned}$$

Repeating the argument for  $t < 0$  then yields

$$\tilde{g}_\sigma(t) \leq c' e^{2\delta|t| - \delta^2 - \log \delta} \tilde{\varphi}_\sigma(t)$$

for all  $|t| \geq \delta$ . Since  $\tilde{g}_\sigma$  is bounded,  $\sup_{|t| \leq \delta} \tilde{g}_\sigma(t) \left( e^{2\delta t - \delta^2 - \log \delta} \tilde{\varphi}_\sigma(t) \right)^{-1}$  exists, and hence (28) holds (for all  $t \in \mathbb{R}$ ) with

$$c = \max \left[ c', \sup_{|t| \leq \delta} \tilde{g}_\sigma(t) \left( e^{2\delta t - \delta^2 - \log \delta} \tilde{\varphi}_\sigma(t) \right)^{-1} \right].$$

Extending to the full  $d$ -dimensional distribution, note that since  $t^2 + 1 > |t|$  for all  $t$ , we have that  $\tilde{g}_\sigma(t) \leq c e^{2\delta t^2 + 2\delta - \delta^2 - \log \delta} \tilde{\varphi}_\sigma(t)$  for all  $t$ . We can then write

$$g_\sigma(t) \leq (c')^d e^{2\delta \|t\|^2 + 2d\delta - d\delta^2 - d \log \delta} \varphi_\sigma(t), \quad (32)$$

which establishes the lemma after collecting terms.
